# Supplementary material
Source: Springer Nature journal article supplement (https://www.springermedizin.de/resource/supplementary/13026_2008_25_MOESM2_ESM.pdf/9644480)

## Diagnostic Tests

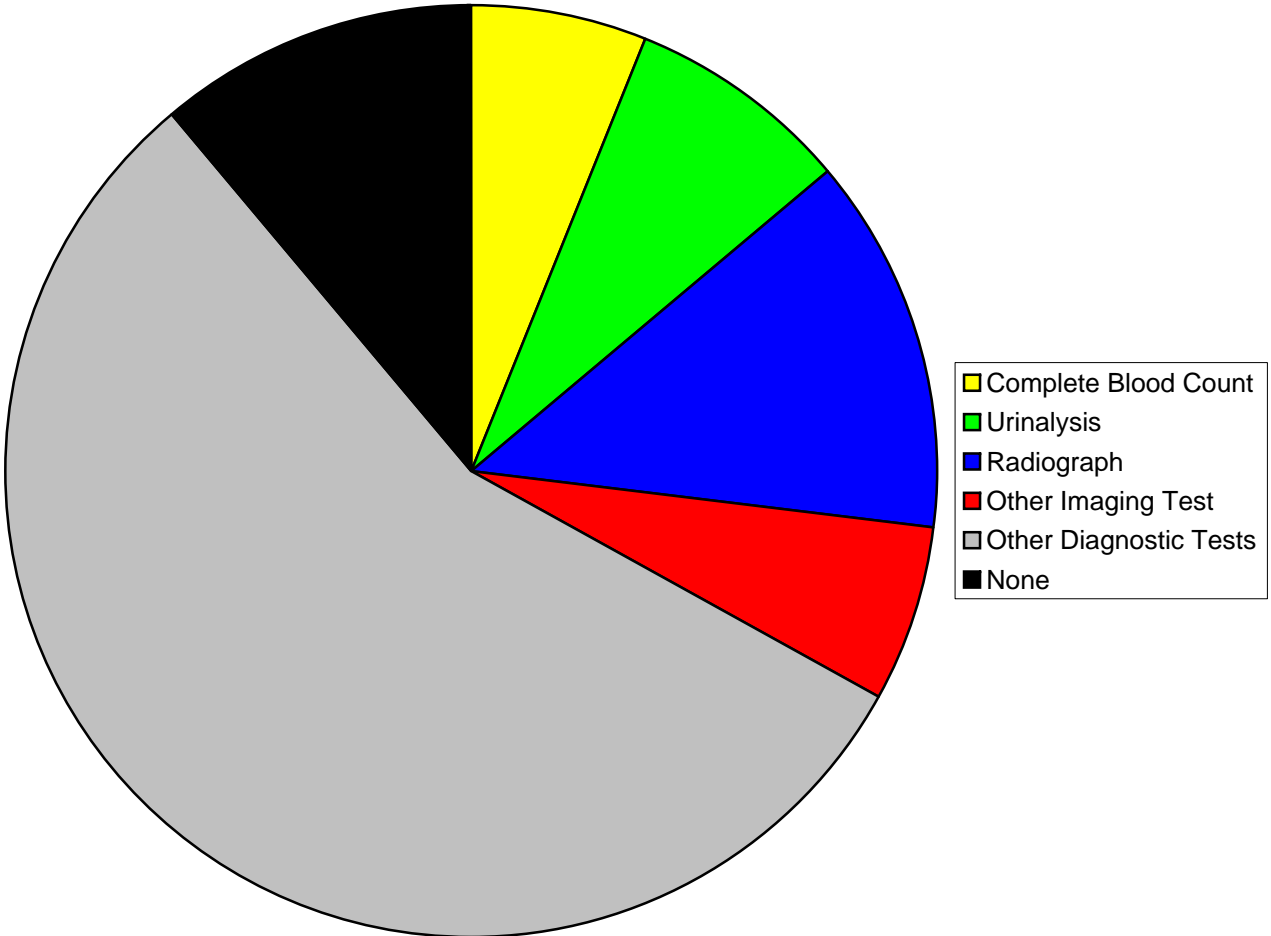

Supplement: MOESM2 [file 9644480]
